# Supplementary material for: Comparison of the structure and methanol electrooxidation ability from irregular PtNi nanocrystals to PtNiRu nanodendrites
Source: Royal Society of Chemistry journal article supplement (doi:10.1039/c9ce01840a), 2020-01-01
Supplement: c9ce01840a1.pdf [file c9ce01840a1.pdf]

## Comparison of structure and methanol electrooxidation ability from irregular PtNi nanocrystal to PtNiRu nanodendrite

Zirong Li,<sup>1,2#</sup> Zhongyue Guan,<sup>2#</sup> Yuting Chang,<sup>2</sup> Die Hu,<sup>2</sup> Baokang Jin<sup>1\*</sup> and Lei Bai<sup>2\*</sup>

<sup>1</sup> College of Chemistry & Chemical Engineering, Anhui University, Hefei, Anhui, China, 230601

<sup>2</sup> College of Chemistry and Materials Engineering, Anhui Science and Technology University, Bengbu, Anhui, 233030, China

E-mail: baileiwj2014@163.com; bkjinhf@aliyun.com

# These authors contributed equally.

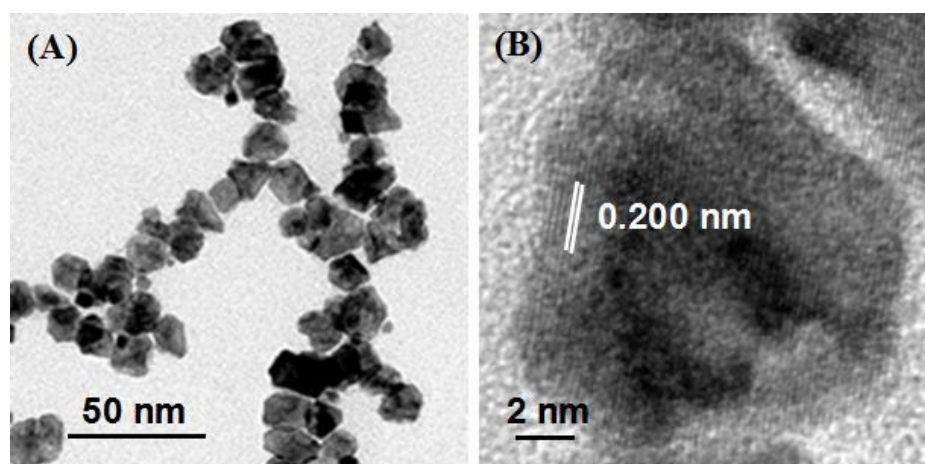

SFig.1. TEM (A) and HRTEM (B) image of PtNi polyhedra.

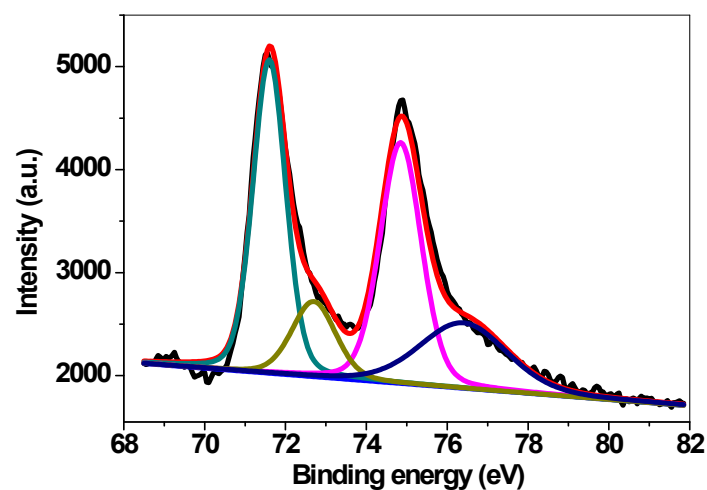

SFig.2. XPS spectrum of Pt 4f in the PtNi polyhedra.

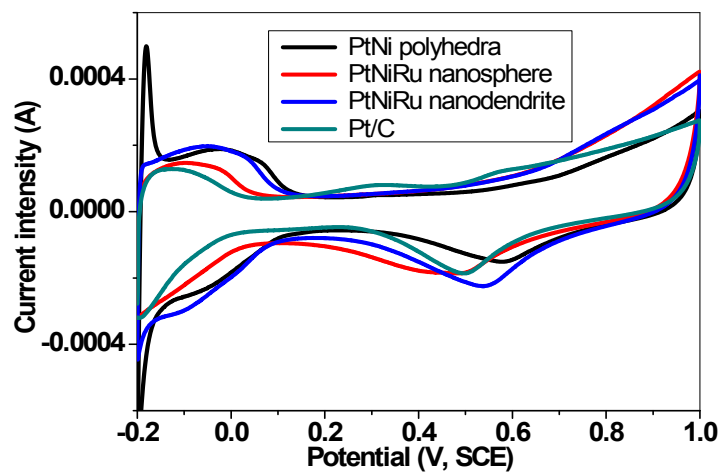

SFig. 3. CV curves of the samples in 0.5 M H<sub>2</sub>SO<sub>4</sub>.

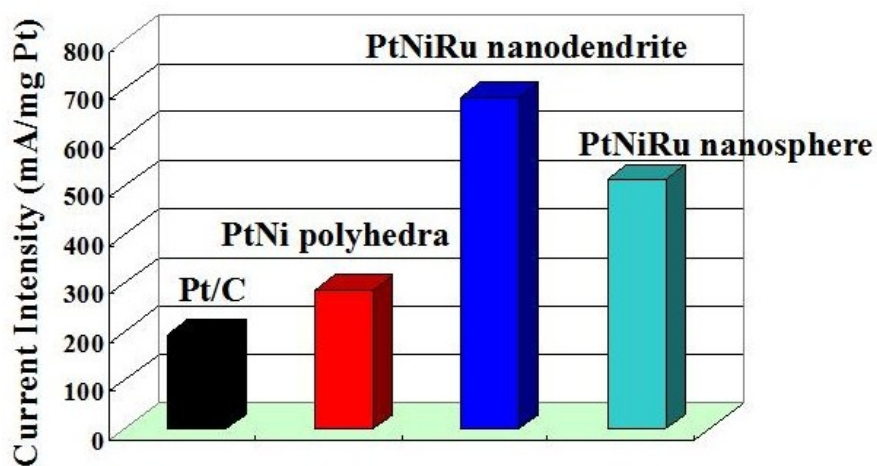

SFig. 4. Comparison of the mass activity of the samples.
